# Supplementary material for: Lipid composition dictates serum stability of reconstituted high-density lipoproteins: implications forin vivoapplications
Source: Royal Society of Chemistry journal article supplement (doi:10.1039/c7nr09690a), 2018-01-01
Supplement: c7nr09690a1.pdf [file c7nr09690a1.pdf]

## Lipid composition dictates serum stability of reconstituted high-density lipoproteins: implications for in vivo applications

Sean F. Gilmore,<sup>1</sup> Timothy S. Carpenter,<sup>1</sup> Helgi I. Ingólfsson,<sup>1</sup> Sandra K. G. Peters,<sup>1</sup> Paul T. Henderson,<sup>2</sup> Craig D. Blanchette,<sup>1</sup> Nicholas O. Fischer<sup>1\*</sup>

<sup>1</sup> Lawrence Livermore National Laboratory, Livermore, CA, 94550

<sup>2</sup> University of California—Davis (UC Davis) and UC Davis Comprehensive Cancer Center, Sacramento, California 95817

\*fischer29@llnl.gov

### Supporting Information

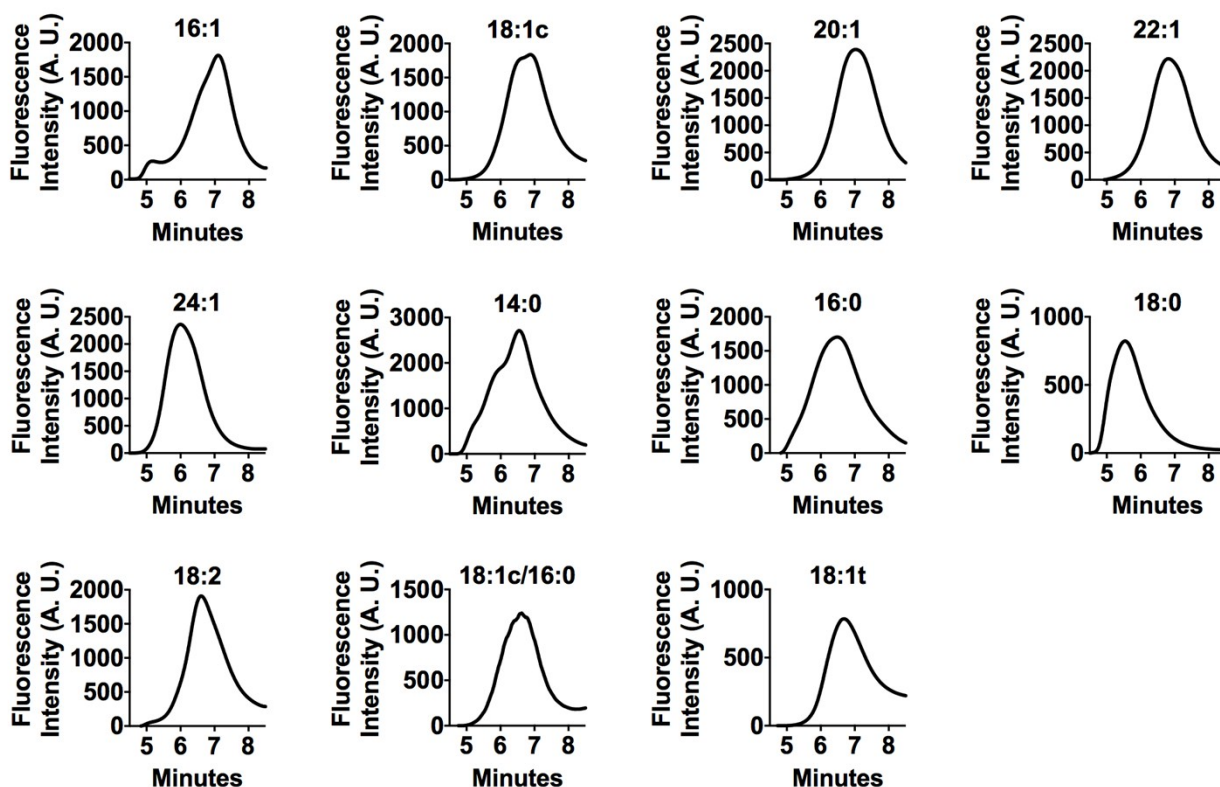

**Supporting Information 1.** Size-exclusion chromatography traces showing the NLP region of all the NLP samples in PBS.

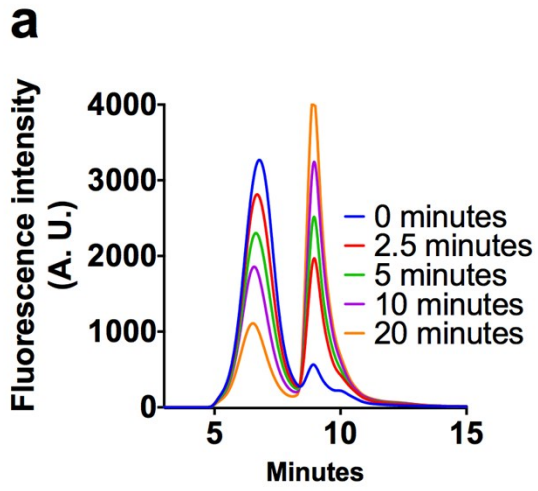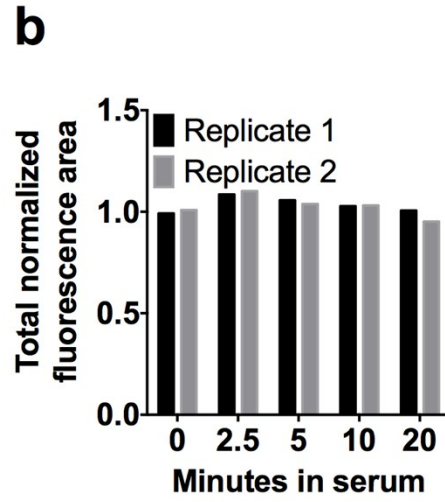

**Supporting information 2.** a, the full SEC fluorescence chromatogram for the data shown in Figure 1b. b, a bar graph showing the total fluorescence area of the curves in S2a.

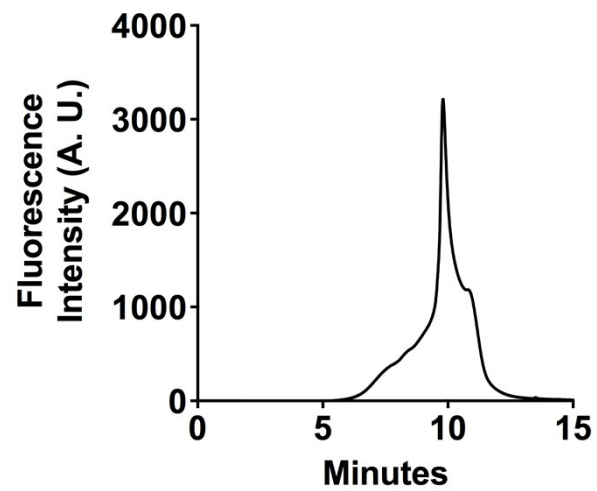

**Supporting Information 3.** A size-exclusion chromatography trace showing 18:0 NLPs following exposure to 0.25 M sodium cholate solution at 100°C.

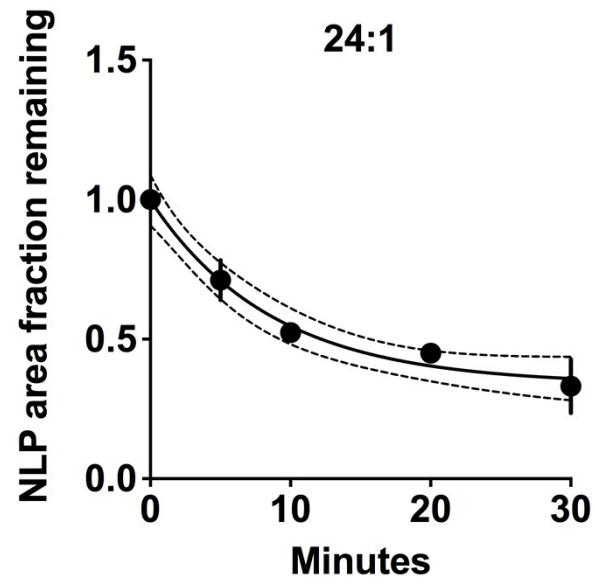

**Supporting Information 4.** 24:1 NLP peak area fraction change over time in serum,  $R^2 = 0.96$ .

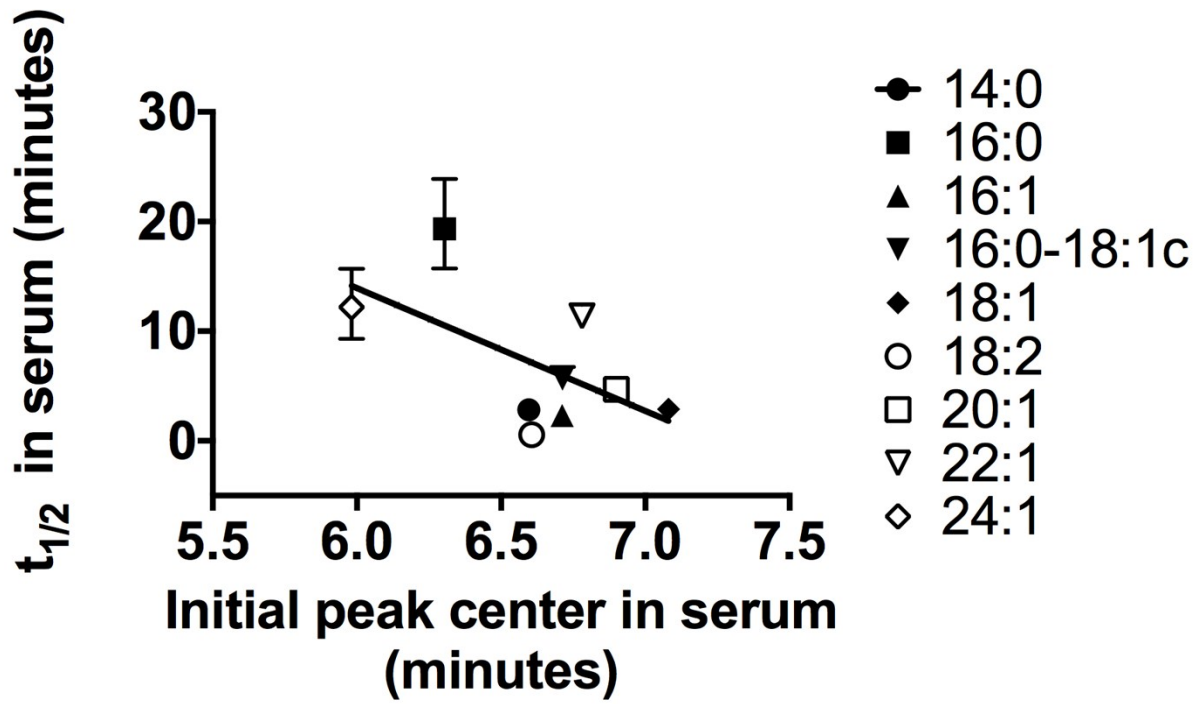

**Supporting information 5.** A plot showing the  $t_{1/2}$  of NLP formulations in serum plotted against the initial NLP peak center in serum.  $R^2 = 0.35$ .

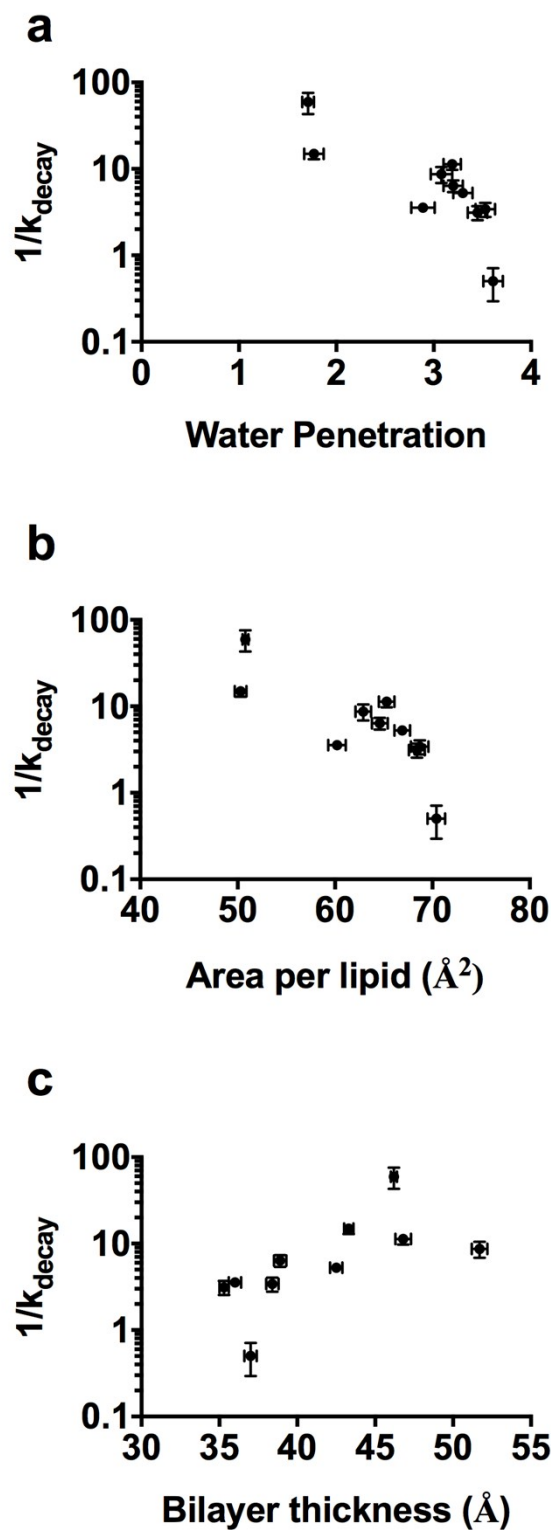

**Supporting information 6.** a, a plot showing the inverse of the experimentally-derived NLP decay constant as a function of the water penetration into the bilayer. b, a plot showing the inverse of the experimentally-derived NLP decay constant as a function of the area per lipid. c, a plot showing the inverse of the experimentally-derived NLP decay constant as a function of the bilayer thickness.

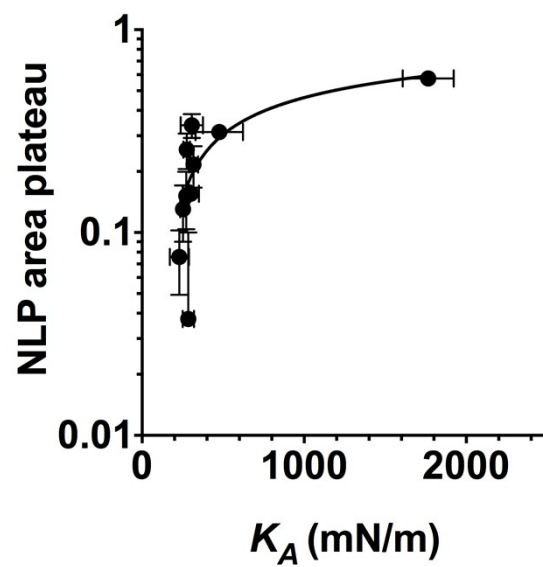

**Supporting information 7.** A plot showing the NLP peak area plateau plotted against the bilayer elasticity values obtained through computational simulations,  $R^2 = 0.76$ .

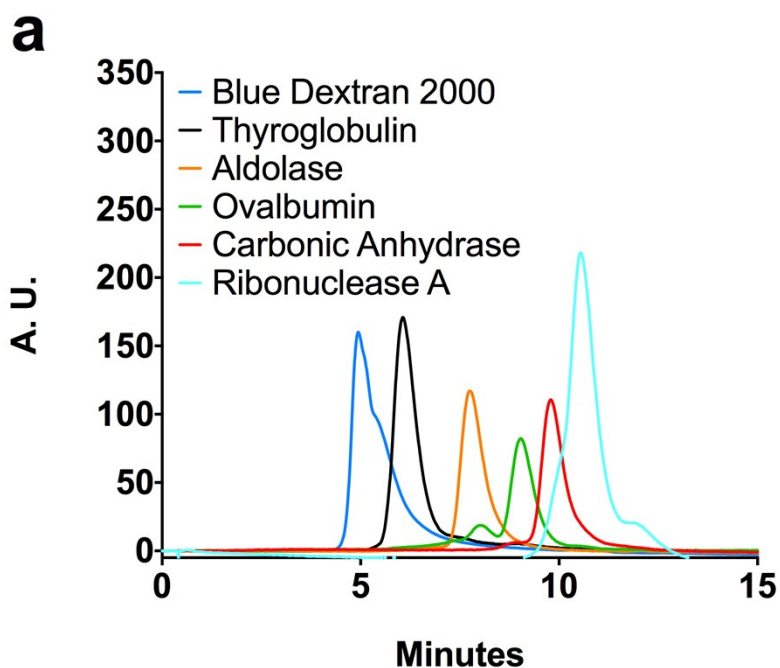

**b**

| Protein            | Molecular weight (kDa) | Elution time (m) | Elution volume (ml) | Stokes radius (nm) |
|--------------------|------------------------|------------------|---------------------|--------------------|
| Ribonuclease A     | 13.7                   | 10.6             | 2.12                | 1.6                |
| Carbonic anhydrase | 29                     | 9.8              | 1.96                | 2.1                |
| Ovalbumin          | 44                     | 9.1              | 1.82                | 2.8                |
| Aldolase           | 158                    | 7.8              | 1.56                | 4.8                |
| Thyroglobulin      | 669                    | 6.1              | 1.22                | 8.6                |
| Blue Dextran 2000  | 2000                   | 5.0              | 1.00                | N/A                |

**Supporting information 8.** a, SEC traces of protein standards (measured with UV detector) run on the analytical S200 Increase column used to analyze NLPs in serum solutions. b, a table with showing the corresponding molecular weight and Stokes radius of the protein standards used in a, as well as the measured elution time and volume.
